# Supplementary material for: Assessing the efficacy of river-based ocean alkalinity enhancement for carbon sequestration under high emission pathways
Source: Copernicus journal article supplement (doi:10.5194/egusphere-2025-2536), 2025-06-23
Supplement: Supplementary file [file egusphere-2025-2536-AC1-supplement.pdf]

## 1     **Response to Reviewer**

2     We sincerely thank the reviewer for their insightful and constructive comments. We  
3     appreciate the acknowledgment that expanding the diversity of OAE simulation  
4     studies is important. Below, we provide a point-by-point response to the main  
5     concerns raised. We have not included specific line numbers where revisions have  
6     been done, as these may be changes following the incorporation of comments from  
7     other reviewers.

## 8     **General Comments**

9     The following article addresses the impact of river-focused ocean alkalinity enhancement  
10    on carbon dioxide removal. It present's findings that mCDR broadly scales with OAE as  
11    other studies have similarly shown. While I believe that it's important to expand the  
12    number of OAE simulation studies and varying the means of alkalinity delivery is critical,  
13    the article is not particularly interesting. The authors could do more to differentiate their  
14    contribution, particularly given their use of an emissions-driven ESM. I was particularly  
15    surprised that they focus so little on changes in atmospheric temperatures, which appear  
16    counterintuitive. Moreover, there is no description at all of the land carbon sink and how  
17    it responds to OAE (one of the principal advantages of using a fully-coupled ESM). I  
18    would like to see both of these aspects developed in a revised manuscript. In my opinion,  
19    several of the current figures need cutting or revising to be useful to the reader.

20    In the following, we address the general comments individually, providing responses  
21    to each point.

22    Reviewer Comment: "The article is not particularly interesting. The authors could do  
23    more to differentiate their contribution, particularly given their use of an emissions-  
24    driven ESM."

25    Response:

26    We appreciate the suggestion and have revised the manuscript to better emphasize the  
27    novelty of our work. Specifically, our study:

- 28       • Implements river-based alkalinity enhancement, reflecting a natural and  
29       spatially realistic pathway of alkalinity delivery that differs from the  
30       commonly assumed uniform ocean-wide input.
- 31       • Uses an emissions-driven, fully coupled Earth System Model (CESM2), which  
32       allows for two-way interactions between climate, ocean chemistry, and carbon  
33       fluxes—features not captured in prescribed-CO<sub>2</sub> simulations.
- 34       • Explores termination effects of OAE (OWE0) in addition to scaling scenarios,  
35       providing insights into persistence and reversibility of OAE-induced changes.

We have added more discussion on the temporal changes of air temperature and land carbon sink. We also reemphasize the novelty and highlight the contributions of the current work in the revised manuscript and also as follows.

*“...To mimic this mechanism, we use an emission-driven, fully coupled Earth System Model to evaluate a riverine-based, global-scale OAE scenario under a high-emission pathway (Shared Socioeconomic Pathway 5-8.5, SSP585), which reflects a natural and spatially realistic pathway of alkalinity delivery that differs from the commonly assumed uniform ocean-wide input. The responsive CO<sub>2</sub> concentration configuration in our simulation allows the interactions between climate, ocean chemistry and carbon fluxes and captures the features not captured in prescribed-CO<sub>2</sub> simulations.”*

*“This study provides the transient responses of ocean system to OAE and insights into persistence and reversibility of OAE-induced changes, as well as the suggestion to future study and deployment of OAE.”*

*“...We also find that reductions in surface air temperature are not proportional to the level of alkalinity addition. This is because the slight cooling induced by OAE is smaller than the interannual variability simulated by the model, and is therefore obscured by internal climate variability (Lenton et al., 2018). We believe this phenomenon warrants further investigation with larger ensembles or longer simulations to confirm its robustness.”*

*“Moreover, the increase in ocean carbon uptake is partially offset by a corresponding decrease in the land carbon sink of −4.31, −7.05, and −9.20 PgC in the OWE5, OWE75, and OWE10 simulations, respectively. These results underscore the importance of considering terrestrial carbon dynamics when evaluating the net effectiveness of ocean alkalinity enhancement. To avoid offsetting the benefits of OAE, complementary strategies to preserve or enhance land carbon sequestration may be necessary.”*

**Reviewer Comment: “I was particularly surprised that they focus so little on changes in atmospheric temperatures, which appear counterintuitive.”**

**Response:**

We thank the reviewer for highlighting this important and counterintuitive aspect of our results. In the revised manuscript, we have expanded the Discussion section to address the changes in atmospheric temperature under riverine OAE scenarios.

Our results show that reductions in surface air temperature are not proportional to the amount of alkalinity added. This disproportionality is primarily due to the relatively modest declines in atmospheric CO<sub>2</sub>, which lead to only a ~10% decrease in

temperature relative to the projected warming under the baseline esm-SSP585 scenario. As a result, the temperature reductions associated with OAE are small and largely masked by interannual variability in the Earth system model.

*“...We also find that reductions in surface air temperature are not proportional to the level of alkalinity addition. This is because the slight cooling induced by OAE is smaller than the interannual variability simulated by the model, and is therefore obscured by internal climate variability (Lenton et al., 2018). We believe this phenomenon warrants further investigation with larger ensembles or longer simulations to confirm its robustness.”*

**Reviewer Comment:** “There is no description at all of the land carbon sink and how it responds to OAE (one of the principal advantages of using a fully-coupled ESM).”

**Response:**

We appreciate this insightful comment. In response, we have added more discussion in the revised manuscript that quantifies changes in the terrestrial carbon sink under each OAE scenario.

To evaluate the land carbon sink, we calculated the total column-integrated carbon over land areas. Our results show that the land carbon sink declines by 4.31, 7.05, and 9.20 PgC in the OWE5, OWE75, and OWE10 simulations, respectively. These values have also been incorporated into the revised Discussion section, where we state:

*“...Moreover, the increase in ocean carbon uptake is partially offset by a corresponding decrease in the land carbon sink of  $-4.31$ ,  $-7.05$ , and  $-9.20$  PgC in the OWE5, OWE75, and OWE10 simulations, respectively. These results underscore the importance of considering terrestrial carbon dynamics when evaluating the net effectiveness of ocean alkalinity enhancement. To avoid offsetting the benefits of OAE, complementary strategies to preserve or enhance land carbon sequestration may be necessary.”*

**Reviewer Comment:** “Several of the current figures need cutting or revising to be useful to the reader.”

**Response:**

Thank you for this helpful suggestion. In response:

- We have removed Figure 1.
- We have redrawn Figure 3 to make it clear.
- Font sizes and color schemes have been adjusted throughout for better readability for figure 5.

105 We hope that these revisions improve the manuscript's readability and impact.

106

107 Specific Comments:

108 L26 Is this true? Wouldn't afforestation-based mCDR also absorb CO<sub>2</sub> and reduce  
109 acidification?

110 We agree with the reviewer that afforestation-based mCDR can also contribute to CO<sub>2</sub>  
111 removal and, indirectly, to the mitigation of ocean acidification. Afforestation  
112 enhances atmospheric CO<sub>2</sub> uptake through biological carbon sequestration, which in  
113 turn reduces the partial pressure of CO<sub>2</sub> in surface waters, thereby decreasing CO<sub>2</sub>  
114 dissolution and alleviating acidification (N'Yeurt et al., 2012). In contrast, OAE  
115 reduces acidification more directly by adding alkaline substances that chemically  
116 neutralize H<sup>+</sup> ions in seawater. To reflect this distinction and avoid overstating the  
117 uniqueness of OAE, we have revised the sentence as follows:

118 *"...is one of the promising Carbon Dioxide Removal methods that can simultaneously*  
119 *absorb CO<sub>2</sub> and alleviate ocean acidification."*

120 L34-35 These are surface atmospheric temperature increases not SST increases I  
121 believe.

122 We are grateful to the reviewer for pointing out the mistake. We have revised this  
123 sentence accordingly as follows:

124 *"...Global average surface atmospheric temperature has already increased by 1.1 °C*  
125 *relative to the 1850–1900 baseline (IPCC, 2023) and continues to rise, approaching*  
126 *the Paris Agreement's target of limiting warming to below 1.5 °C by the end of this*  
127 *century (UNFCCC, 2015)."*

128 L53 I would use a more recent estimate of this consistent with the latest scenarios  
129 (e.g. (Smith et al., 2024))

130 Thank you. The numbers have been updated according to estimate by Smith et al.  
131 (2024):

132 “...However, an additional CO<sub>2</sub> sequestration requirement of -5.3 GtCO<sub>2</sub> per year in  
133 the Paris-consistent scenario based on the baseline of -2.1 GtCO<sub>2</sub> per year in 2011-  
134 2020 even under 76% greenhouse gas emission reduction (Smith et al., 2024).”

135 L59 Excluding geological reservoirs.

136 We sincerely thank you for pointing out the inaccurate expression in our manuscript.  
137 We have revised this sentence and describe the ocean as the largest carbon reservoir  
138 on Earth surface.

139 “...As the largest carbon reservoir at the Earth’s surface, the ocean holds substantial  
140 potential for enhanced CO<sub>2</sub> uptake.”

141 L65-67 See previous point, other techniques could potentially also do this.

142 Agreed. We have adjusted the tone accordingly, both in our response and in the  
143 revised manuscript:

144 “...Among these, OAE is promising because it offers the dual benefit of reducing  
145 atmospheric CO<sub>2</sub> and direct effect on alleviating ocean acidification, making it an  
146 ideal candidate for mitigating CO<sub>2</sub>-driven climate impacts through mCDR.”

147 L68-70 This definition is a bit inaccurate. Alkalinity is perhaps better defined as the  
148 excess of H<sup>+</sup> accepters over donors.

149 Agreed. We have modified the definition accordingly, both in our response and in the  
150 revised manuscript.

151 “Alkalinity is defined as the excess of proton acceptors over proton donators in  
152 seawater.”

153 L70-71 This alkalinity decline may also be due to biotic feedbacks, (Barrett et al.,  
154 2025; Kwiatkowski et al., 2025).

155 Agreed. we have modified the sentence accordingly as follows and also in the revised  
156 manuscript:

157 “...A decline in surface alkalinity, driven by enhanced upper-ocean stratification and  
158 bio-activity, has been shown to reduce oceanic carbon uptake (Barrett et al., 2025;  
159 Kwiatkowski et al., 2025).”

160 L73 I’m not sure what excess  $H^+$  is in this context.

161 We appreciate the reviewer’s comment. Our original intention was to describe the  
162 removal of additional protons resulting from ocean acidification. However, we agree  
163 that the term “excess  $H^+$ ” is potentially misleading and redundant with the  
164 accompanying description of rising pH. Therefore, we have removed this phrase in  
165 the revised manuscript.

166 The revised sentence now reads:

167 “OAE works by introducing carbonate, bicarbonate, or other  $H^+$  acceptors into  
168 surface waters, thereby increasing carbonate ion concentrations, raising pH, and  
169 reducing the partial pressure of  $CO_2$  ( $pCO_2$ ) in seawater.”

170 L74-75 Disequilibrium is not always enhanced. In areas of natural carbon outgassing,  
171 such as eastern boundary upwelling systems, it would likely be reduced. The net  
172 effect would be the same however, enhanced ocean carbon storage.

173 We thank the reviewer for this helpful clarification. We agree that air–sea  $CO_2$   
174 disequilibrium is not uniformly enhanced across all regions, particularly in natural  
175 outgassing areas such as eastern boundary upwelling systems, where disequilibrium  
176 may actually be reduced. To improve clarity, we have revised the sentence  
177 accordingly:

178 “By altering the air–sea  $CO_2$  disequilibrium, OAE can enhance oceanic  $CO_2$  uptake  
179 in undersaturated regions and reduce outgassing in oversaturated regions, thereby  
180 increasing net ocean carbon storage and ultimately lowering atmospheric  $CO_2$   
181 concentrations.”

182 L103-104 There are a growing number of regional OAE simulation studies that go  
183 beyond this, some of which the authors go on to cite.

184 Thank you for your suggestion. Now we have modified this sentence as follows:

185 “...Although there are a growing number of regional OAE simulations in recent years  
186 (e.g. Burt et al., 2021; Feng et al., 2017; He & Tyka, 2023), we still lack research  
187 using more practical delivery methods, such as river-based OAE.”

188 Figure 1. I don’t find this figure particularly useful. The link between weathering and  
189 atmospheric CO<sub>2</sub> is unclear to me. Is this due to intensification of the hydrological  
190 cycle? And the role of sources and sinks of alkalinity in ocean sediments and marine  
191 biota is absent.

192 We have removed this figure.

193 L130 This equation is unnecessary (and is unnumbered).

194 Agreed. We have removed this equation.

195 L141 Add equation number.

196 Added.

197 L145-149. The language used here is not clear. Prescribed CO<sub>2</sub> can still be transiently  
198 changing. Are simulations concentration-driven or emissions-driven? If emissions-  
199 driven, with dynamic atmospheric CO<sub>2</sub> this needs to be explicit here.

200 We agree that in a prescribed CO<sub>2</sub> configuration CO<sub>2</sub> concentration will transiently  
201 change in atmosphere module. In such a setting, the atmospheric CO<sub>2</sub> forcing driving  
202 the ocean module changes in a fixed trajectory. Whereas, in a prognostic CO<sub>2</sub>  
203 configuration, atmospheric CO<sub>2</sub> concentration is dynamically changed according to  
204 the net strength of sources (e.g., emission) and sinks (e.g., land and ocean sinks):

205 “...We use prognostic CO<sub>2</sub> settings to explore the responses of climate to OAE. In  
206 such a setting, dynamic atmospheric CO<sub>2</sub> forcing is used to drive the ocean and  
207 biogeochemistry module to avoid the uncertainty that stems from the difference  
208 between responsive and prescribed atmospheric CO<sub>2</sub> forcing to ocean (Tyka, 2025).”

209 L153 “concentration” should be “emissions” as emissions not concentrations are  
210 prescribed in esm-hist.

211 Thank you for pointing this out. We have changed the “concentration” to “emissions”.

212 “When the climate is balanced with forcing, the historical simulation is performed as  
213 an emission-driven simulation using the historical atmospheric CO<sub>2</sub> emissions (esm-  
214 hist) prescribed by CMIP6 protocol till the year of 2014.”

215 L155 I don’t know what an SSP-based RCP is. You either ran an SSP or an RCP or is  
216 this some hybrid forcing I am not aware of.

217 Thank you for catching this mistake. We indeed used the emissions-driven SSP5-8.5  
218 forcing scenario (esm-ssp585), not the concentration-driven variant. We have  
219 corrected the sentence in the revised manuscript to reflect this accurately:

220 “After that, the system is forced by an emission-driven SSP5-8.5 future scenario (esm-  
221 ssp585; Jones et al., 2016) till 2100.”

222 L162-164 These simulation descriptions are confusing. What is meant by “based on...  
223 from 2050”?

224 In our simulation setup, we first ran the OWE5 scenario continuously from 2020 to  
225 2100. Based on the conditions and outputs from the first 30 years of the OWE5  
226 simulation, we then initialized three additional scenarios—OWE75, OWE10, and  
227 OWE0—starting from the year 2050 and continuing through 2100. In these latter  
228 simulations, the riverine alkalinity flux was modified relative to OWE5 beginning in  
229 year 2050, corresponding to year 30 of the OWE5 run.

230 “...

231 Exp2 (OWE75): A 5-fold enhancement of riverine alkalinity flux is applied from 2020  
232 to 2049, followed by an increase to a 7.5-fold enhancement from 2050 to 2100.

233 Exp3 (OWE10): A 5-fold enhancement of riverine alkalinity flux is applied from 2020  
234 to 2049, followed by an increase to a 10-fold enhancement from 2050 to 2100.

235 Exp4 (OWE0): A 5-fold enhancement of riverine alkalinity flux is applied from 2020  
236 to 2049, followed by complete cessation of alkalinity enhancement from 2050 to  
237 2100.”

238 L165-169 Is the ocean alkalinity inventory balanced in the control run? Or is there  
239 some drift?



240 The model was spun-up by the community. In the spin-up runs, the burial of  $\text{CaCO}_3$   
241 was tuned to balance the alkalinity input from rivers (Long et al., 2021). We do not  
242 reran the spin-up phase and used the the restart files of the year 2020 obtained from  
243 data manager in CESM forum (<https://bb.cgd.ucar.edu/cesm/>). There may be still a  
244 trivial drift in these restart files, but it should not have a significant impact on our  
245 simulation because we conducted the control run and OAE simulations using the same  
246 restart file. Therefore, any drift will be canceled.

247 Figure 3 In printed format it is impossible to see any of the detail of this figure. Fonts  
248 are too small, lines too thin and legends impossible to read.

249 The image quality might be compressed when generating the PDF. In any case, we  
250 have redrawn the figure and made it clear.

251 “...

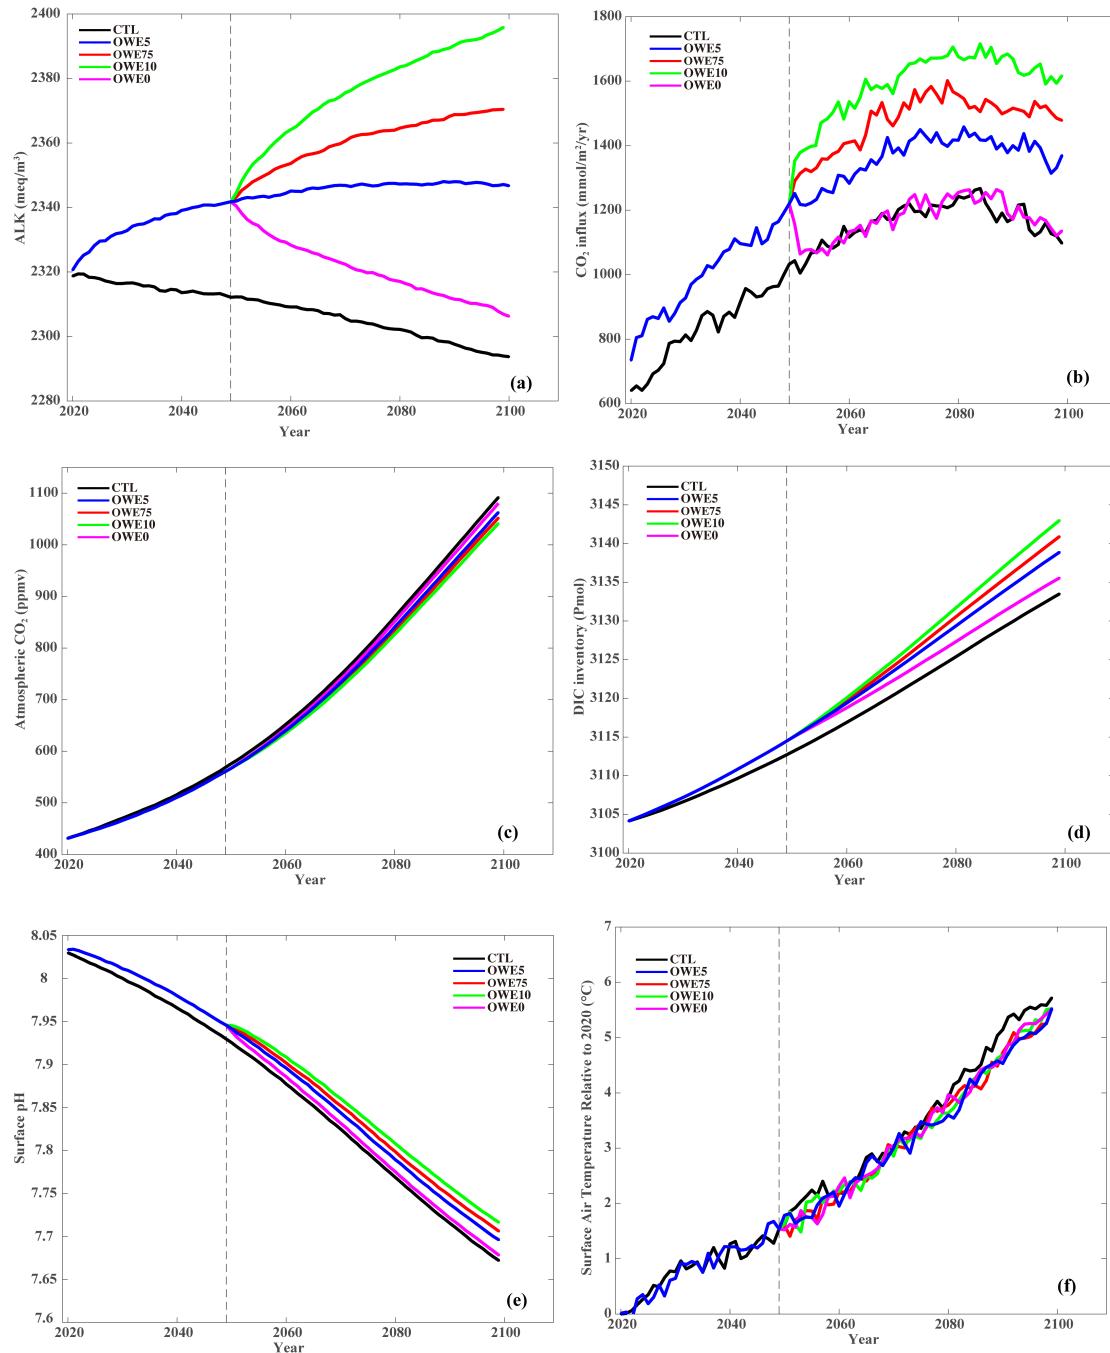

Figure 3: Global changes of (a) upper 100 m mean alkalinity (unit:  $\text{meq/m}^3$ ), (b)  $\text{CO}_2$  influx (unit:  $\text{mmol/m}^2/\text{yr}$ ), (c) atmospheric  $\text{CO}_2$  (unit:  $\text{ppmv}$ ), (d) integrated DIC inventory (unit:  $\text{Pmol}$ ), (e) surface pH, (f) surface air temperature (unit:  $^\circ\text{C}$ ). Dash lines starting from in the year 2050 denote the onset of the  $7.5\times$ ,  $10\times$  alkalinity enhancement scenarios, as well as the termination of alkalinity addition via rivers.”

L220 Clarify in the legend whether these are global zonal means or a specific transect.

259 Thank you. It is zonal mean. We have modified the legend of the figure as follows:

260 "...Vertical distribution of zonal mean alkalinity anomaly. (a) differences between  
261 OWE5 and CTL, (b) differences between OWE75 and CTL, c) differences between  
262 OWE10 and CTL, (d) differences between OWE0 and CTL, (e) differences between  
263 OWE0 and OWE5."

264 L225-226 See earlier point. OAE does not always enhance disequilibrium. If it does, I  
265 would like to see a plot of this.

266 We now have modified this part as follows:

267 "...OAE modifies the air-sea  $\text{CO}_2$  gradient, promoting greater  $\text{CO}_2$  absorption in  
268 areas where the ocean is undersaturated and diminishing  $\text{CO}_2$  release in regions  
269 where it is supersaturated. This results in a net increase in ocean carbon storage and  
270 contributes to a reduction in atmospheric  $\text{CO}_2$  levels."

271 L235 I think uatm units should be used for partial pressures.

272 Thank you for your suggestion. We have changed the units to uatm in line 238-239  
273 and in Fig. 6:

274 "In OWE5, OWE75, and OWE10, surface  $p\text{CO}_2$  decreases by more than  $20 \mu\text{atm}$   
275 compared to the control, with OWE10 showing the greatest reduction. In contrast,  
276 OWE0 achieves only a  $\sim 10 \mu\text{atm}$  decrease by 2100."

277 "

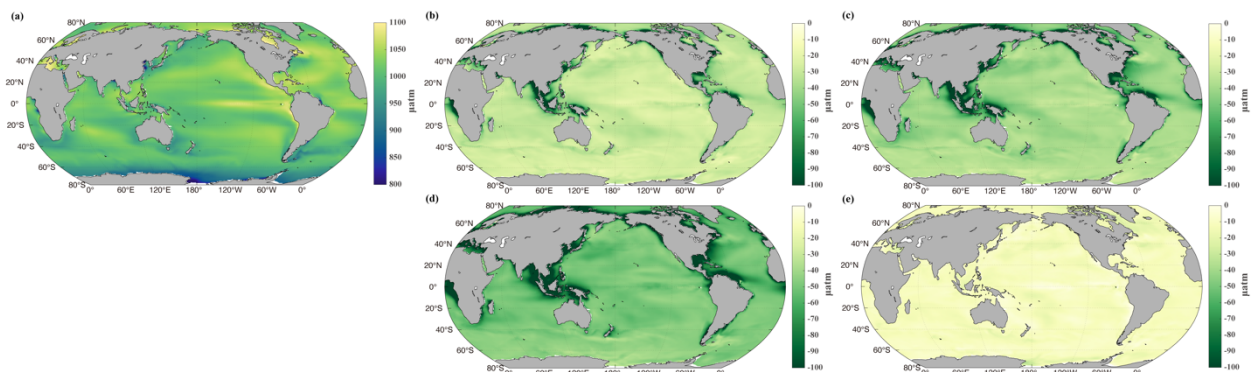

278

279 **Figure 6: Distribution of surface  $p\text{CO}_2$ . (a) control simulation, (b) difference**  
280 **between OWE5 and CTL, (c) difference between OWE75 and CTL, (d) difference**  
281 **between OWE10 and CTL, (e) difference between OWE0 and CTL.**

282 ”

283 L245 How much later? Give the year.

284 We have added the year in revised manuscript.

285 “...the CO<sub>2</sub> influx eventually returns to the same rate as in the control simulation at  
286 the 5th year after termination (Fig. 3b).

287 L258 This seems like a trivial equation to provide, it’s just a depth integral.

288 Agreed. The equation has been removed.

289 L308 I would avoid describing a global pH level as “healthy”.

290 Thank you. We have changed the wroding as follows.

291 “... Under the high-emission SSP585 scenario, surface pH declines rapidly from a  
292 relatively high level (pH = 8.03) to a more acidic state (pH = 7.67) by 2100.”

293 L332 The figure ordering is strange with respect to the text.

294 We double checked the ordering of all the figures and their apparence in the text, and  
295 have made sure that they are consistent.

296 L334-335 Does this mean the reductions in atmospheric air temperatures are not  
297 proportional to OAE? This is an important finding and requires discussion which  
298 appears to be absent. Why do the authors think this is the case? Is this because of  
299 internal variability? Are larger ensemble sizes of each experiment required?

300 Please reply to this comment in “General Comments” parts and have copied the  
301 content as follows:

302 “... We also find that reductions in surface air temperature are not proportional to the  
303 level of alkalinity addition. This is because the slight cooling induced by OAE is  
304 smaller than the interannual variability simulated by the model, and is therefore  
305 obscured by internal climate variability (Lenton et al., 2018). We believe this  
306 phenomenon warrants further investigation with larger ensembles or longer  
307 simulations to confirm its robustness.”

L342 So the reductions in atmospheric CO<sub>2</sub> are consistent with the extent of OAE but not the reductions in surface temperatures? Please discuss, perhaps the temperature values are type errors, it's hard to see differences in figure 3.

Please see our reply to your previous comment. We have also redrew figures and rewording the the legend.

“...

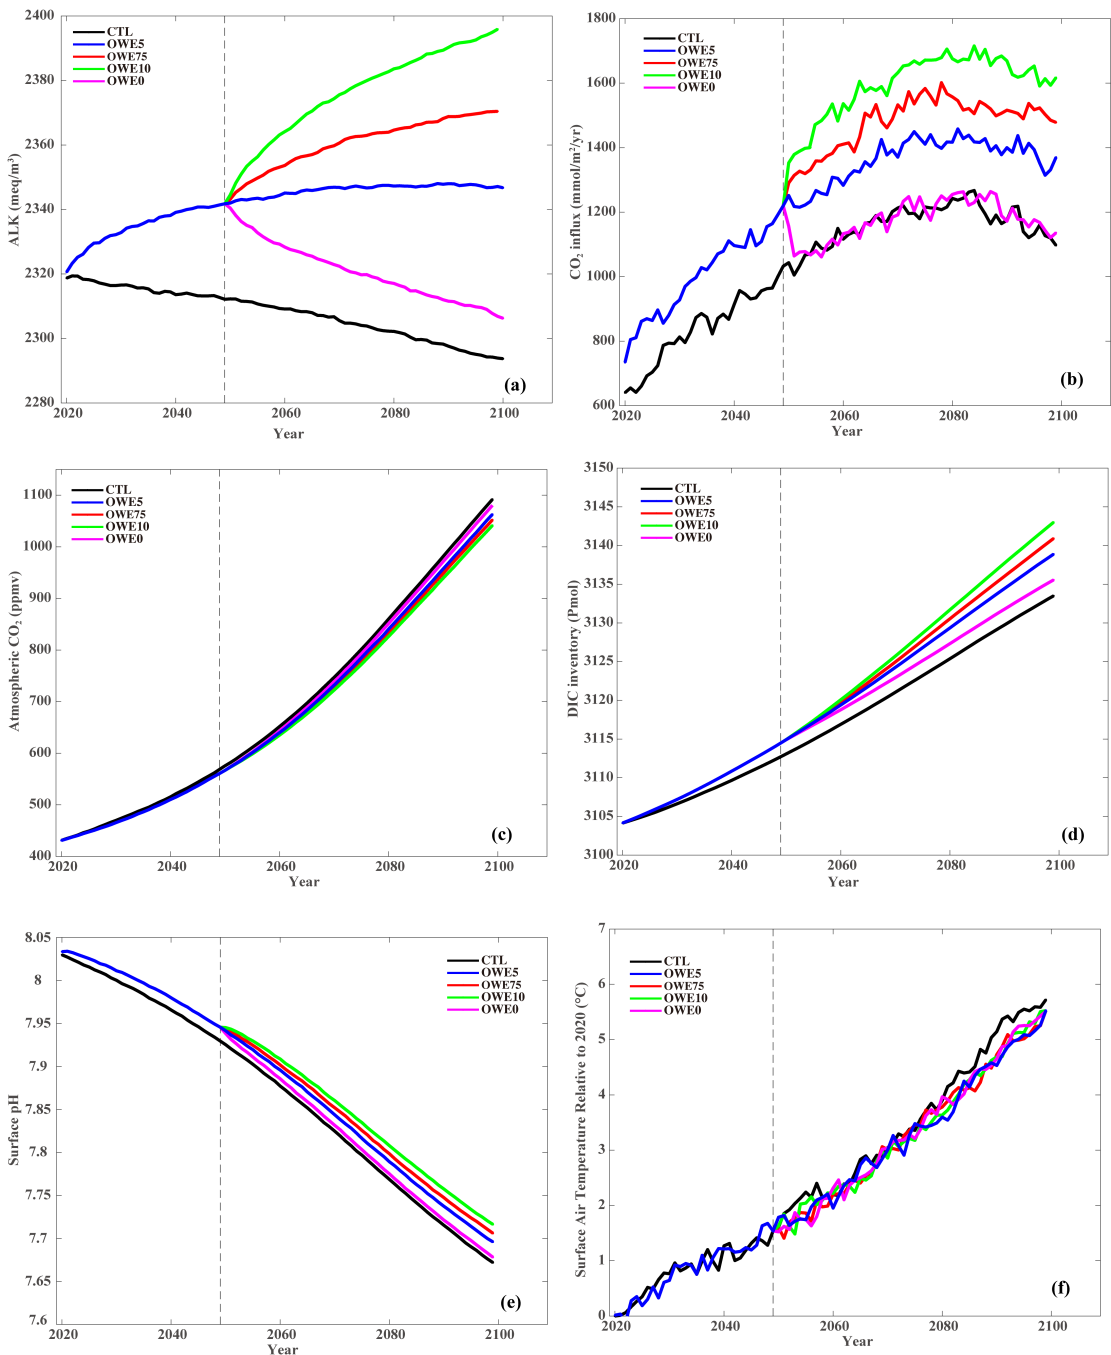

Figure 3: Global changes of (a) upper 100 m mean alkalinity (unit: meq/m<sup>3</sup>), (b) CO<sub>2</sub> influx (unit: mmol/m<sup>2</sup>/yr), (c) atmospheric CO<sub>2</sub> (unit: ppmv), (d) integrated DIC inventory (unit: Pmol), (e) surface pH, (f) surface air temperature (unit: °C). Dash lines starting from in the year 2050 denote the onset of the 7.5×, 10× alkalinity enhancement scenarios, as well as the termination of alkalinity addition via rivers.”

L367-368 It’s primarily due to the transport of water masses into the subsurface prior to full- equilibration.

Agreed. The characteristics of the water mass is also related to the location where the OAE is deployed. And different deployment methods of OAE also affect the dissolution rate of alkalinity, thereby influencing the efficiency of OAE. In this section, we have included information about water masses, thus making the discussion more comprehensive.

“...The wide range in previous studies is probably due to spatial and temporal variability, as well as differences in OAE application methods, which will influence the contact time between the water mass and the atmosphere and the time for water mass to reach equilibrium.”

L383-375. Can the authors explain the role of the simulation time? Is this because of sediment feedbacks? Most ESMs lack such feedbacks anyway (see Planchat et al., 2023) so I’m not sure running the models for longer would make a difference.

Köhler (2020) demonstrate that the calcite saturation horizon and lysocline transition zones in sediment will deepen under OAE, which finally lead to an increase of CaCO<sub>3</sub> accumulation. This process extracts alkalinity from the ocean and reduces the efficiency of OAE. However, as you mentioned, most of the Earth System models did not consider the sediment processes in alkalinity cycle. We have added some discussions in this part:

“...Most ESMs do not take into account sediment processes, or they treat sediment processes as a part of the closed calcium carbonate cycle without considering the complex processes of sedimentation (Planchat et al., 2023). The absence of sedimentation processes may lead to an overestimation of the efficiency of OAE on a longer time scale.”

345 “...Although the short simulation in He and Tyka (2023) and our study likely missed  
346 the decline stage in adsorption efficiency in Köhler (2020), but the lack of sediment  
347 processes will overrate the efficiency later than 2100.”

348 L386-389 Are these differences in efficiency robust? Have similar effects been  
349 detailed in other studies and if so, can the authors explain the mechanism controlling  
350 this?

351 We believe these differences in efficiency are robust. In previous studies, the  
352 efficiency of OAE along the coastal regions would show a rapid increase in the initial  
353 years, and then the growth rate would slow down, reaching a relatively slow  
354 efficiency growth rate or a stable efficiency level (e.g. He & Tyka, 2023). We believe  
355 that the lower efficiency in OWE10 is due to the increased magnitude of OAE. It has  
356 not yet reached a relatively stable efficiency stage by the end of this century, and thus  
357 its efficiency is slightly lower compared to the other two groups of experiments.  
358 However, we did not run the simulation from later than 2100, thus we cannot give the  
359 final efficiency.

360 L398-400 Be clear that Zhou et al perform OAE locally in all grid cells and don't rely  
361 on rivers for delivery.

362 Thank you. We have clarified the applying method of OAE in Zhou et al. (2024).

363 “...Moreover, our findings differ from those of Zhou et al. (2024), who perform OAE  
364 locally in all grid cells and found that absorption efficiency is higher in the equatorial  
365 Pacific compared to the subtropical regions.”

366 L458 How do these rates of acidification and carbon uptake compare to those in the  
367 CTL simulation?

368 We have calculated the pH decrease rate as the indicator of the acidification rate. We  
369 find the acidification has accelerated in OWE0 simulation after the termination of  
370 OAE with a rate of 0.0054, faster than 0.0047 (from 2020 to 2100) and 0.0053 (from  
371 2050 to 2100) in control run. However, the carbon uptake rate (the influx of CO<sub>2</sub>, see  
372 Fig. 3b) decrease to the similar rate with control run under OWE0 at the 5th year after  
373 OAE termination.

374 L487-489 Indicative that even riverine OAE results in loss of non-equilibrated water  
375 masses from the surface ocean, which are equilibrated of ocean circulation timescales  
376 of centuries.

377 Thank you for your suggestion. We have added these discussions in our revised  
378 manuscript:

379 *“This indicates that water masses altered by OAE and not in equilibrium with the*  
380 *atmosphere will return to the surface through ocean circulation on centennial*  
381 *timescales.”*

382



383

384 Reference:

- 385 Barrett, R. C., Carter, B. R., Fassbender, A. J., Tilbrook, B., Woosley, R. J., Azetsu-Scott, K., Feely, R.  
386 A., Goyet, C., Ishii, M., Murata, A., & Pérez, F. F. (2025). Biological Responses to Ocean  
387 Acidification Are Changing the Global Ocean Carbon Cycle. *Global Biogeochemical Cycles*,  
388 39(3), e2024GB008358. <https://doi.org/https://doi.org/10.1029/2024GB008358>
- 389 Burt, D. J., Fröb, F., & Ilyina, T. (2021). The Sensitivity of the Marine Carbonate System to Regional  
390 Ocean Alkalinity Enhancement [Original Research]. *Frontiers in Climate*, 3.  
391 <https://doi.org/10.3389/fclim.2021.624075>
- 392 Feng, E. Y., Koeve, W., Keller, D. P., & Oschlies, A. (2017). Model-Based Assessment of the CO<sub>2</sub>  
393 Sequestration Potential of Coastal Ocean Alkalinization. *Earth's Future*, 5(12), 1252-1266.  
394 <https://doi.org/https://doi.org/10.1002/2017EF000659>
- 395 He, J., & Tyka, M. D. (2023). Limits and CO<sub>2</sub> equilibration of near-coast alkalinity enhancement.  
396 *Biogeosciences*, 20(1), 27-43. <https://doi.org/10.5194/bg-20-27-2023>
- 397 IPCC. (2023). Climate Change 2023: Synthesis Report. Contribution of Working Groups I, II and III  
398 to the Sixth Assessment Report of the Intergovernmental Panel on Climate Change [Core  
399 Writing Team, H. Lee and J. Romero (eds.)]. *Intergovernmental Pannel on Climate Change*  
400 (IPCC). <https://doi.org/10.59327/IPCC/AR6-9789291691647>.
- 401 Köhler, P. (2020). Anthropogenic CO<sub>2</sub> of High Emission Scenario Compensated After 3500 Years  
402 of Ocean Alkalinization With an Annually Constant Dissolution of 5 Pg of Olivine [Original  
403 Research]. *Frontiers in Climate*, 2.  
404 <https://www.frontiersin.org/journals/climate/articles/10.3389/fclim.2020.575744>
- 405 Kwiatkowski, L., Planchat, A., Pyolle, M., Torres, O., Bouttes, N., Comte, A., & Bopp, L. (2025).  
406 Declining coral calcification to enhance twenty-first-century ocean carbon uptake by  
407 gigatonnes. *Proceedings of the National Academy of Sciences*, 122(23), e2501562122.  
408 <https://doi.org/doi:10.1073/pnas.2501562122>
- 409 Lenton, A., Matear, R. J., Keller, D. P., Scott, V., & Vaughan, N. E. (2018). Assessing carbon dioxide  
410 removal through global and regional ocean alkalinization under high and low emission  
411 pathways. *Earth Syst. Dynam.*, 9(2), 339-357. <https://doi.org/10.5194/esd-9-339-2018>
- 412 Long, M. C., Moore, J. K., Lindsay, K., Levy, M., Doney, S. C., Luo, J. Y., Krumhardt, K. M., Letscher,  
413 R. T., Grover, M., & Sylvester, Z. T. (2021). Simulations With the Marine Biogeochemistry  
414 Library (MARBL). *Journal of Advances in Modeling Earth Systems*, 13(12), e2021MS002647.  
415 <https://doi.org/https://doi.org/10.1029/2021MS002647>
- 416 N'Yeurt, A. d. R., Chynoweth, D. P., Capron, M. E., Stewart, J. R., & Hasan, M. A. (2012). Negative  
417 carbon via Ocean Afforestation. *Process Safety and Environmental Protection*, 90(6), 467-  
418 474. <https://doi.org/https://doi.org/10.1016/j.psep.2012.10.008>
- 419 Planchat, A., Kwiatkowski, L., Bopp, L., Torres, O., Christian, J. R., Butenschön, M., Lovato, T., Séférian,  
420 R., Chamberlain, M. A., Aumont, O., Watanabe, M., Yamamoto, A., Yool, A., Ilyina, T.,  
421 Tsujino, H., Krumhardt, K. M., Schwinger, J., Tjiputra, J., Dunne, J. P., & Stock, C. (2023). The  
422 representation of alkalinity and the carbonate pump from CMIP5 to CMIP6 Earth system  
423 models and implications for the carbon cycle. *Biogeosciences*, 20(7), 1195-1257.

424 <https://doi.org/10.5194/bg-20-1195-2023>  
425 Smith, S. M., Geden, O., Gidden, M. J., Lamb, W. F., Nemet, G. F., Minx, J. C., Buck, H., Burke, J., Cox,  
426 E., Edwards, M. R., Fuss, S., Johnstone, I., Müller-Hansen, F., Pongratz, J., Probst, B. S., Roe,  
427 S., Schenuit, F., Schulte, I., & Vaughan, N. E. (2024). *The State of Carbon Dioxide Removal*  
428 *- 2nd Edition*. <https://osf.io/f85qj/>  
429 UNFCCC. (2015). Paris Agreement. *United Nations Framework Convention on Climate Change*  
430 *(UNFCCC)*.  
431 Zhou, M., Tyka, M. D., Ho, D. T., Yankovsky, E., Bachman, S., Nicholas, T., Karspeck, A. R., & Long,  
432 M. C. (2024). Mapping the global variation in the efficiency of ocean alkalinity  
433 enhancement for carbon dioxide removal. *Nature Climate Change*.  
434 <https://doi.org/10.1038/s41558-024-02179-9>  
435  
436
